# Supplementary material
Source: PubMed Central journal article supplement (PMC3272096)
Supplement: NIHMS343021-supplement-1_si_001.pdf [file NIHMS343021-supplement-1_si_001.pdf]

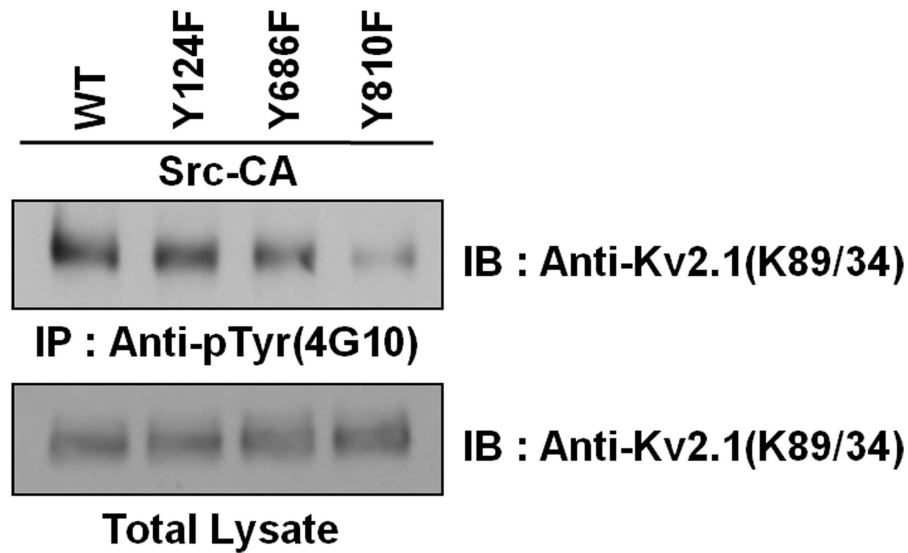

99x60mm (600 x 600 DPI)

**Figure S1.** Mutating Y124, Y686, and Y810 decreases tyrosine phosphorylation of Kv2.1. HEK293 cells were cotransfected with Kv2.1-WT or mutants (Y124F, Y686F, and Y810F) and Src-CA. Cells were lysed and immunoprecipitated with anti-p4G10 mAb. The immunoprecipitation products were separated by 7.5% SDS-PAGE and immunoblotted with anti-Kv2.1 mAb.
